# Supplementary material
Source: HighWire-hosted journal article supplement (https://www.cmajopen.ca/highwire/filestream/81049/field_highwire_adjunct_files/1/original-submission.pdf)
Supplement: original-submission.pdf [file original-submission.pdf]

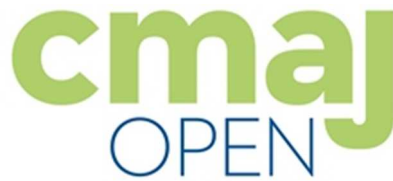

## Restaurant foods: when sodium goes out, what goes in? A longitudinal study

|                               |                                                                                                                                                                                                                                                                                                                                                                                                                                                                                                                                                                                                                                                                                                                                                                                                                                                                                                                                                                                                                                                                                                                                                                                                                                                                                                                                                                                                                                                                                                                                                                                                                                                                            |
|-------------------------------|----------------------------------------------------------------------------------------------------------------------------------------------------------------------------------------------------------------------------------------------------------------------------------------------------------------------------------------------------------------------------------------------------------------------------------------------------------------------------------------------------------------------------------------------------------------------------------------------------------------------------------------------------------------------------------------------------------------------------------------------------------------------------------------------------------------------------------------------------------------------------------------------------------------------------------------------------------------------------------------------------------------------------------------------------------------------------------------------------------------------------------------------------------------------------------------------------------------------------------------------------------------------------------------------------------------------------------------------------------------------------------------------------------------------------------------------------------------------------------------------------------------------------------------------------------------------------------------------------------------------------------------------------------------------------|
| Journal:                      | <i>CMAJ Open</i>                                                                                                                                                                                                                                                                                                                                                                                                                                                                                                                                                                                                                                                                                                                                                                                                                                                                                                                                                                                                                                                                                                                                                                                                                                                                                                                                                                                                                                                                                                                                                                                                                                                           |
| Manuscript ID                 | CMAJOpen-2017-0137                                                                                                                                                                                                                                                                                                                                                                                                                                                                                                                                                                                                                                                                                                                                                                                                                                                                                                                                                                                                                                                                                                                                                                                                                                                                                                                                                                                                                                                                                                                                                                                                                                                         |
| Manuscript Type:              | Descriptive                                                                                                                                                                                                                                                                                                                                                                                                                                                                                                                                                                                                                                                                                                                                                                                                                                                                                                                                                                                                                                                                                                                                                                                                                                                                                                                                                                                                                                                                                                                                                                                                                                                                |
| Date Submitted by the Author: | 22-Oct-2017                                                                                                                                                                                                                                                                                                                                                                                                                                                                                                                                                                                                                                                                                                                                                                                                                                                                                                                                                                                                                                                                                                                                                                                                                                                                                                                                                                                                                                                                                                                                                                                                                                                                |
| Complete List of Authors:     | Scourboutakos, Mary; University of Toronto, Nutritional Sciences<br>Murphy, Sarah; University of Toronto, Department of Nutritional Sciences<br>L'Abbé, Mary; University of Toronto, Department of Nutritional Sciences                                                                                                                                                                                                                                                                                                                                                                                                                                                                                                                                                                                                                                                                                                                                                                                                                                                                                                                                                                                                                                                                                                                                                                                                                                                                                                                                                                                                                                                    |
| Keywords:                     | Nutrition and metabolism, Public health                                                                                                                                                                                                                                                                                                                                                                                                                                                                                                                                                                                                                                                                                                                                                                                                                                                                                                                                                                                                                                                                                                                                                                                                                                                                                                                                                                                                                                                                                                                                                                                                                                    |
| More Detailed Keywords:       | sodium, food supply, fast-food, salt substitute, monosodium glutamate, MSG                                                                                                                                                                                                                                                                                                                                                                                                                                                                                                                                                                                                                                                                                                                                                                                                                                                                                                                                                                                                                                                                                                                                                                                                                                                                                                                                                                                                                                                                                                                                                                                                 |
| Abstract:                     | <p>Background: Restaurant foods have high sodium levels and efforts have been made to promote reductions. The objective of this study was to understand if salt substitutes are being used to lower sodium levels in restaurant foods.</p> <p>Methods: A longitudinal database (MENU-FLIP) containing nutrition information for Canadian chain restaurants with <math>\geq 20</math> locations nationally was created in 2010 and updated in 2013 and 2016. In 2016, when available, ingredient lists were collected from restaurant websites and searched for the presence of salt substitutes. Changes in sodium levels (per serving) and the prevalence of salt substitutes in 222 unique foods from 12 of the leading fast-food restaurant chains were compared across three time points.</p> <p>Results: Sixty-nine percent of foods contained a salt substitute. Salt substitutes were found in every restaurant (<math>n=12</math>) for which ingredient data was available. The most common substitutes were yeast extracts (in 30% of foods), calcium chloride (28%), monosodium glutamate (14%) and potassium chloride (12%). Foods that contained salt substitutes decreased by a significantly higher amount of sodium (<math>190 \pm 42</math> mg per serving) when compared to foods that did not contain a salt substitute (<math>40 \pm 17</math> mg per serving, <math>p &lt; 0.001</math>).</p> <p>Interpretation: Salt substitutes are prevalent in restaurant foods, and are one means by which restaurants are lowering sodium levels in their foods. At this point in time, the potential consequences of these findings, if any, are uncertain.</p> |

1  
2  
3  
4  
5  
6  
7  
8  
9  
10  
11  
12  
13  
14  
15  
16  
17  
18  
19  
20  
21  
22  
23  
24  
25  
26  
27  
28  
29  
30  
31  
32  
33  
34  
35  
36  
37  
38  
39  
40  
41  
42  
43  
44  
45  
46  
47  
48  
49  
50  
51  
52  
53  
54  
55  
56  
57  
58  
59  
60

Confidential

**Title:** Restaurant foods: when sodium goes out, what goes in? A longitudinal study

**Word Count:** 2582

**3 Figures**

**1 Supplementary Table**

**Financial Disclosure/Conflicts of Interest:** None to declare

**Authors:**

Mary J. Scourboutakos,<sup>1</sup> PhD

Sarah A. Murphy<sup>1</sup>

Mary R. L'Abbé,<sup>1</sup> PhD

**Author's Affiliations:**

<sup>1</sup>Department of Nutritional Sciences, Faculty of Medicine, University of Toronto, Toronto, Ontario, Canada

**Corresponding Author:**

Mary L'Abbé, PhD, Earle W. McHenry Professor and Chair, Department of Nutritional Sciences, Faculty of Medicine, University of Toronto, FitzGerald Building, Room 315, 150 College Street, Toronto ON M5S 3E2, Canada. E-mail: [mary.labbe@utoronto.ca](mailto:mary.labbe@utoronto.ca)

**Funding:**

This study was financially supported by the Canadian Institutes of Health Research Vanier Scholarship (MS), the McHenry Endowed Chair Award (ML), and partially through a collaborative partnership with Public Health Ontario.

**Author Contributions:**

Dr. Scourboutakos and Dr. L'Abbé had full access to all of the data in the study and take responsibility for the integrity of the data and the accuracy of the data analysis.

Scourboutakos and L'Abbé conceived and designed the study; Scourboutakos, Murphy and L'Abbé acquired the data; Scourboutakos analyzed and interpreted the data; Scourboutakos wrote the manuscript; Scourboutakos, Murphy and L'Abbé reviewed the manuscript for important intellectual content; L'Abbé obtained funding and supervised the study.

**Acknowledgements:**

A special thank you is owed to Tina Qutta, who assisted with data-entry checks; Professor Paul Corey, who provided statistical guidance; and to all of the "L'Abbé Lab Girls" for unwavering research support and encouragement.

1  
2 36 **ABSTRACT**

3  
4 37 **Introduction:** Restaurant foods have high sodium levels and efforts have been made to  
5 38 promote reductions. The objective of this study was to understand if salt substitutes are being  
6 39 used to lower sodium levels in restaurant foods.

7  
8 40 **Methods:** A longitudinal database (MENU-FLIP) containing nutrition information for Canadian  
9 41 chain restaurants with ≥20 locations nationally was created in 2010 and updated in 2013 and  
10 42 2016. In 2016, when available, ingredient lists were collected from restaurant websites and  
11 43 searched for the presence of salt substitutes. Changes in sodium levels (per serving) and the  
12 44 prevalence of salt substitutes in 222 unique foods from 12 of the leading fast-food restaurant  
13 45 chains were compared across three time points.

14  
15 46 **Results:** Sixty-nine percent of foods contained a salt substitute. Salt substitutes were found in  
16 47 every restaurant (n=12) for which ingredient data was available. The most common substitutes  
17 48 were yeast extracts (in 30% of foods), calcium chloride (28%), monosodium glutamate (14%)  
18 49 and potassium chloride (12%). Foods that contained salt substitutes decreased by a significantly  
19 50 higher amount of sodium (190±42 mg per serving) when compared to foods that did not  
20 51 contain a salt substitute (40±17 mg per serving, p<0.001).

21  
22 52 **Conclusions:** Salt substitutes are prevalent in restaurant foods, and are one means by which  
23 53 restaurants are lowering sodium levels in their foods. At this point in time, the potential  
24 54 consequences of these findings, if any, are uncertain.

25  
26 55 **BACKGROUND**

27  
28 56 Excessive dietary sodium intake is a causal risk factor for hypertension,(1) which is the  
29 57 leading preventable risk factor for death worldwide.(2) Research has shown that 27% of dietary  
30 58 sodium comes from food obtained at restaurants.(3) This is partly due to the increased  
31 59 prevalence of eating outside-the-home,(4-8) along with the excessive sodium levels commonly  
32 60 found in restaurant foods.(9-11)

33  
34 61 In response to the high sodium levels in restaurant foods, efforts such as the US  
35 62 National Salt Reduction Initiative,<sup>12, 13</sup> and the FDA’s reduction targets have been established to  
36 63 promote reductions in sodium.(12-14) In Canada, sodium reduction targets have been set for  
37 64 packaged foods, but not yet for restaurant foods.(15) However, several restaurant chains have  
38 65 made voluntary commitments to lower sodium.(11, 16-18)

39  
40 66 It has been recommended that the best strategy to lower sodium is to gradually reduce  
41 67 levels across the food supply to enable consumers’ taste-buds to re-sensitize to less salt.(12, 19,  
42 68 20) Salt substitutes (such as potassium chloride, monosodium glutamate, and yeast extracts)  
43 69 are one means by which sodium can be removed without reducing the perceived salty  
44 70 taste.(19, 21)

45  
46 71 The market share for salt substitutes such as monosodium glutamate (MSG), yeast  
47 72 extracts and hydrolyzed vegetable proteins is currently on the rise.(22) MSG and other  
48 73 ingredients that could contain free glutamates (such as yeast extracts and hydrolyzed vegetable  
49 74 protein) are desirable substitutes because they stimulate the fifth taste bud—umami.(23)

Furthermore, when compared to table salt, MSG contains one-third the amount of sodium, thus enabling sodium reductions as high as 40%, with no loss of palatability.(24)

That being said, MSG has been a controversial ingredient since 1968 when the so-called “Chinese Restaurant Syndrome” was first reported to include numbness at the back of the neck and arms, as well as palpitations and weakness.(25) Since then a number of studies have investigated the effect of MSG on a variety of symptoms (including headache, nausea, flushing, dizziness, burning, perspiration, chest pain/pressure, muscle pain and insulin secretion) with mixed results.(26-39) These mixed findings were likely due to the fact that many early studies were anecdotal,(25, 40, 41) had small sample sizes,(29-32, 36) tested a wide range of doses (varying from 1.25 to 10 grams),(26, 39) administered MSG in a variety of food contexts (ie non-caloric beverages versus whole meals),<sup>24</sup>(29, 30, 33, 35) (42, 43) and were confounded by the fact that some individuals are sensitive to MSG, while others are not.(26) (28, 32, 34, 39)

To date, no studies have investigated the prevalence of salt substitutes in restaurant foods. The first objective of this study was to investigate the prevalence of salt substitutes in restaurant foods. The second objective was to understand if the presence of salt substitutes is associated with lower sodium levels in restaurant foods. The third objective was to determine if glutamate-containing substitutes (MSG, yeast extracts and hydrolyzed vegetable proteins) are associated with lower sodium levels in restaurant foods.

## METHODS

Data for this study was derived from the MENU-FLIP University of Toronto restaurant nutrition database. This study was the third in a series of longitudinal studies that have investigated changes in sodium levels in Canadian chain restaurant foods every three years using the MENU-FLIP database.(44, 45)

### MENU-FLIP database

In 2010, a database of Canadian chain restaurant foods (MENU-FLIP) was created using publically available nutrition information provided online by all chain restaurants that had  $\geq 20$  locations nationally.(46) According to the 2010 *Directory of Restaurant and Fast-Food Chains in Canada*, 172 restaurants had  $>20$  locations nationally.(47) After searching websites, 95 provided nutrition information online. Data for over 9000 a la carte entrées, side dishes, beverages, and condiments were collected and compiled into the database. Foods were categorized according to the type of restaurant (fast-food versus sit-down), the specific restaurant they are from (ie McDonalds, Subway; subsequently referred to as the “restaurant variable”), the type of food (ie hamburger, sandwich, chicken, french fries; subsequently referred to as the “food category” variable) and the type of food item (ie entrée, side dish, kids’ item). Additional details describing the database can be found elsewhere.(46)

In 2010, 4044 entrées, side dishes, and kids’ meals were analyzed in the baseline report.(44) In May 2013, restaurant websites were revisited and data was recollected.(45) When available, the updated nutrient information collected in 2013 was matched to the existing product data from 2010. In 2013 data for 2198 of the same foods were matched across the two time points. When previous data had not been collected for a particular food item, the food was labeled as

1  
2 115 being a “new product”. In May 2016, this process was repeated. Data collected in 2016 was  
3 116 entered and matched by one author (SAM). Another author (MJS) double-checked data entry  
4 117 and matches. In addition, range and logic checks were conducted and 10% of the dataset was  
5 118 verified against the original source by a third-party data checker.

7 119 After sodium levels (per serving) in 2016 were subtracted from sodium levels (per serving) in  
8 120 2010, foods were coded as having “increased”, “decreased” or “stayed the same”. This was  
9 121 subsequently converted into a binary “decrease versus didn’t decrease” variable that  
10 122 distinguished between foods whose sodium level decreased versus foods that did not decrease  
11 123 (increased/stayed the same). Among foods whose sodium level decreased, a numerical  
12 124 “magnitude of decrease” variable as calculated by subtracting 2010 sodium levels (per serving)  
13 125 from 2016 levels.

16  
17 126 **Inclusion/exclusion criteria**

18  
19 127 Of the 95 restaurants that provided information, thirty-four were excluded from the 2013  
20 128 follow-up analysis because they provided incomplete data, details are reported elsewhere.(45)  
21 129 An additional 8 restaurants were excluded from the 2016 follow-up for the following reasons:  
22 130 they stopped providing information online (n=2), they no longer provided serving size  
23 131 information (n=3), they only provided data for beverages/baked goods (n=3).

25  
26 132 The following foods were excluded from this analysis: foods that are not a major source of  
27 133 dietary sodium (beverages, baked goods, desserts and ice cream), appetizers (because portion  
28 134 sizes varied widely from two to ten servings), sauces and condiments (they were not  
29 135 consistently reported), meals that reported data for entrées in combination with side dishes  
30 136 (only individual, a la carte, menu items were analyzed), foods for which serving size or sodium  
31 137 information was unavailable, size duplications, and foods in categories that had less than 10  
32 138 items.

34  
35 139 **Ingredient information procurement**

36  
37 140 Ingredient information was collected from restaurant websites in 2016. The list of salt  
38 141 replacements in Appendix D of the Institute of Medicine’s “Strategies to Reduce Sodium  
39 142 Intakes” was used to identify potential salt substitutes.(19) Ingredient lists were searched for all  
40 143 substitutes listed in the report (**supplementary table 1**). When a food contained a salt  
41 144 substitute, this information was entered into the MENU-FLIP database. Each salt substitute was  
42 145 coded separately as a binary (yes/no) variable. Two additional aggregate variables were also  
43 146 created: “salt substitute” (a binary yes/no variable to indicate what foods contained any salt  
44 147 substitute) and “glutamate-containing substitutes” (a binary yes/no variable to indicate which  
45 148 foods contained monosodium glutamate, OR hydrolyzed vegetable protein OR yeast extracts).  
46 149 According to the aforementioned IOM report, hydrolyzed vegetable protein and yeast extracts  
47 150 “often contain MSG”.(19) A complete list of ingredient names that were considered to  
48 151 potentially contain MSG can be found in **supplementary table 1**.

52  
53 152 **Statistical Analysis**

The proportion of foods that contained any substitute, each substitute, and glutamate-containing substitutes was tabulated and stratified across foods that decreased versus did not decrease.

Chi-square tests were used to assess the association between containing a “salt substitute” and whether a food decreased in sodium per serving (the “decrease versus did not decrease” variable). This test was repeated for each substitute and the “glutamate-containing substitutes” variable.

Among the sub-set of foods whose sodium level decreased, the non-parametric Wilcoxon-Mann-Whitney test was used to compare the median magnitude of decrease in foods that contained a salt substitute versus foods that did not contain a salt substitute. Comparisons of the magnitude of decrease were computed overall, and stratified by food category.

All statistical analyses were conducted using SAS version 9.3 software (SAS Institute Inc. Cary, NC).

## RESULTS

The analysis included a total of 666 foods (222 unique foods) from 12 of the leading fast-food restaurants in Canada. The following chains were included: A&W, Arby's, Burger King, Edo Japan, Kentucky Fried Chicken, McDonald's, Pizza Pizza, Pizza 73, Subway, Taco Del Mar, Taco Time and Tim Hortons. The sample encompassed 84% of outlets from the top ten restaurant chains in Canada. This included 11,333 outlets, representing 39% of all chain-restaurant outlets across Canada.

### Prevalence of salt substitutes

Sixty-nine percent of foods contained a salt substitute. Yeast extracts were the most common salt substitute found in 30% of foods (**figure 1**), followed by calcium chloride (in 28% of foods), monosodium glutamate (in 14% of foods), potassium chloride (in 12% of foods), hydrolyzed vegetable proteins (in 8% of foods) and lactates (in 4% of foods).

Salt substitutes were found in every restaurant (n=12) for which ingredient data was available. More than 50% of chicken, cheeseburgers and sandwiches/wraps (often chicken and turkey sandwiches) contained salt substitutes, while 100% of tacos/burritos, stir fry entrées, and pizza slices contained salt substitutes (**figure 2**).

### Association between salt substitutes and magnitude of decrease in sodium

Sixty-four percent of the foods that contained a salt substitute decreased in sodium (mg per serving) between 2010 and 2016. Foods that contained a salt substitute decreased by a significantly higher amount of sodium ( $190 \pm 42$  mg per serving) compared to foods that did not contain a salt substitute ( $40 \pm 17$  mg per serving,  $p < 0.001$ ) (**figure 3**). This trend was seen in all analyzable food categories and was significant in hamburgers and cheeseburgers ( $p < 0.001$ ).

### Glutamate-containing substitutes



Salt substitutes that contain or often contain free glutamates (MSG, yeast extracts, and hydrolyzed vegetable proteins) were found in 53% of foods. 70% of foods that had a glutamate-containing substitute decreased in sodium between 2010 and 2016 and were significantly more likely to have decreased in sodium ( $p=0.0345$ ) compared to foods that did not have a glutamate-containing substitute. Foods with glutamate-containing substitutes had a significantly higher magnitude of decrease ( $190\pm39$  mg/serving) compared to foods that did not have a glutamate containing substitute ( $60\pm51$  mg/serving,  $p<0.001$ ).

Glutamate-containing substitutes were found in nearly every restaurant (except one) that provided ingredient information. Eighty-percent of chicken menu-items (including battered/fried chicken, and breaded chicken strips) contained MSG (figure 2).

**INTERPRETATION**

The results of this study suggest that salt substitutes are being used to help achieve sodium reductions in fast-food restaurants. 69% of foods contained salt substitutes. Furthermore, foods that contained salt substitutes decreased by a significantly higher amount of sodium when compared to foods that did not contain salt substitutes.

**MSG**

MSG was found in 14% of foods investigated in this study and was particularly prevalent in fast-food chicken products. MSG is considered a safe food additive,(48) however, according to the International Classification of Headache Disorders, MSG (or more specifically, free glutamate) can be a causative trigger of headaches in healthy populations, and especially in migraine sufferers.(49) MSG is believed to elicit symptoms because of the free (unbound) glutamate that it contains. Glutamate is the most ubiquitous excitatory neurotransmitter in the body(50) and has been demonstrated to play a critical role in headache pathophysiology in animal models and human studies.(29, 30, 51-57) However, whether or not dietary glutamate consumed in the context and amounts currently found in meals can elicit symptoms is controversial.

It should be noted that glutamate is present in many foods.(58) While some foods contain glutamate in its free form (including ripe tomatoes [172 mg per medium tomato] and parmesan cheese [120 mg per two tablespoons]), most naturally occurring dietary glutamate is bound to other amino acids (unlike MSG) and is thus slowly metabolized and less likely to elicit symptoms.(58)

Previous studies have detected a dose-response when MSG is administered at increasing levels.(26-28) One study suggested that the threshold for reactivity may be 2.5 grams,(26) and anecdotally reported that a highly seasoned restaurant meal could provide as much as 5 grams of MSG. At this time, the dosage of MSG in restaurant foods is unknown as levels have never been formally investigated or reported. Therefore, no conclusion can be made regarding whether the current dosage in fast-foods has potential to elicit symptoms.

**Context-dependent effects of MSG**

MSG may have different effects depending on the context in which it is consumed. Animal models have proposed that a spike in plasma glutamate is the mechanism by which glutamate



causes symptoms.(59, 60) Research has shown that when MSG is consumed on its own (ie administered in a calorie-free beverage) it causes a peak plasma concentration of glutamate one hour after ingestion.(43) However, when MSG is ingested with carbohydrates, measurable plasma concentrations of glutamate are not achieved.(61) Similarly, one of the largest studies of MSG concluded that symptoms are only present when large doses are given without food.(27) However, it should be noted that other studies have detected symptoms when MSG was administered with tomato juice,(28) or in the context of a lunch meal.(33) In this study, MSG was found in a variety of food categories (ranging from chicken to sandwiches to soup) with varying levels of accompanying carbohydrate. Hence, potential effects from the MSG detected in this study could be mitigated by the food context. Thus, before warnings or recommendations can be made regarding the presence of MSG in the restaurant food supply, more research is needed to understand the extent to which food context mitigates the effect of MSG.

### **Hydrolyzed vegetable proteins and yeast extracts**

The results showed that yeast extracts were the most common salt substitute found in restaurant foods. Yeast extracts often contain free-glutamate,(19) but may also contain glutamate bound to other amino acids. Therefore, the exact amount of free-glutamate in yeast extracts is unknown. Thus, even if the amount of yeast extract in restaurant foods was quantified, the dosage of free-glutamates in these foods would still be uncertain. Furthermore, there is no research investigating symptoms resulting from yeast extract consumption. Hence, inferences cannot be made as to whether these additives could elicit the symptoms that MSG has been associated with. Thus, considering the prevalence of yeast extracts in the food supply, there is a need for more research on these substitutes.

### **Limitations**

The small sample (n=222) of foods for which ingredient information was available and the lack of longitudinal data on the prevalence of salt substitutes prior to 2016 are limitations of this study. Hence, this study demonstrates associations between salt substitutes and sodium level (per serving), but does not prove that salt substitutes have been added to achieve sodium reductions. Many restaurant foods are constantly introduced or removed from menus, therefore, the results of this study only include foods that have persisted on menus between 2010 and 2016.

Ingredient data were only available for fast-food chains; therefore, it is unknown whether the findings in this study would be applicable to sit-down restaurant chains and independent restaurants. In addition, our dataset only represents restaurants that provided nutrition and ingredient information online.

Research on MSG is highly controversial. Susceptibility to MSG-related symptoms varies from person to person and depends on dose, amount and food source. Hence, future research is needed to determine the exact dose of MSG and free glutamates in restaurant foods. Therefore, at this point in time, conclusions cannot be drawn regarding whether or not the current MSG-dosage present in restaurant foods is sufficient to elicit symptoms. Hence, the potential consequences of these findings, if any, are uncertain.

269 Conclusion

270 Salt substitutes are prevalent in restaurant foods and may be a means by which restaurants are  
271 responding to calls to lower sodium. More research is needed to understand the implications of  
272 these findings.

274 REFERENCES

275 1. Intersalt: an international study of electrolyte excretion and blood pressure. Results for 24 hour  
276 urinary sodium and potassium excretion. Intersalt Cooperative Research Group. BMJ (Clinical research  
277 ed). 1988;297(6644):319-28.

278 2. Lopez AD, Mathers CD, Ezzati M, Jamison DT, Murray CJ. Global and regional burden of disease  
279 and risk factors, 2001: systematic analysis of population health data. Lancet. 2006;367(9524):1747-57.

280 3. Quader ZS, Zhao L, Gillespie C, Cogswell ME, Terry AL, Moshfegh A, et al. Sodium Intake Among  
281 Persons Aged >=2 Years - United States, 2013-2014. MMWR Morbidity and mortality weekly report.  
282 2017 Mar 31;66(12):324-238. PubMed PMID: 28358799. Epub 2017/03/31. eng.

283 4. Guthrie JF, Lin BH, Frazao E. Role of food prepared away from home in the American diet, 1977-  
284 78 versus 1994-96: changes and consequences. J Nutr Educ Behav. 2002 May-Jun;34(3):140-50. PubMed  
285 PMID: 12047838. Epub 2002/06/06. eng.

286 5. United States Department of Agriculture-Economic Research Service. Food Expenditures 2015  
287 [cited 2016 January 2]. Available from: <http://www.ers.usda.gov/data-products/food-expenditures.aspx>.

288 6. United States Department of Agriculture. Food Away-From-Home 2014 [cited 2015 January 4].  
289 Available from: [http://www.ers.usda.gov/topics/food-choices-health/food-consumption-demand/food-](http://www.ers.usda.gov/topics/food-choices-health/food-consumption-demand/food-away-from-home.aspx#nutrition)  
290 [away-from-home.aspx#nutrition](http://www.ers.usda.gov/topics/food-choices-health/food-consumption-demand/food-away-from-home.aspx#nutrition).

291 7. Garriguet D. Canadians' eating habits Ottawa2007 [cited 2015 Dec 4]. Available from:  
292 <http://www.statcan.gc.ca/pub/82-003-x/2006004/article/9609-eng.htm>.

293 8. Garriguet D. Nutrition: Findings from the Canadian Community Health Survey Overview of  
294 Canadians' Eating Habits. In: Division HS, editor. Ottawa2004.

295 9. Johnson CM, Angell SY, Lederer A, Dumanovsky T, Huang C, Bassett MT, et al. Sodium content of  
296 lunchtime fast food purchases at major US chains. Archives of Internal Medicine. 2010;170(8):732-4.

297 10. Wu HW, Sturm R. Changes in the Energy and Sodium Content of Main Entrees in US Chain  
298 Restaurants from 2010 to 2011. J Acad Nutr Diet. 2013 Sep 27. PubMed PMID: 24095622. Epub  
299 2013/10/08. Eng.

300 11. Jacobson MF, Havas S, McCarter R. Changes in sodium levels in processed and restaurant foods,  
301 2005 to 2011. JAMA Intern Med. 2013 Jul 22;173(14):1285-91. PubMed PMID: 23699927. Epub  
302 2013/05/24. eng.

303 12. New York City Department of Health and Mental Hygiene. National Salt Reduction Initiative -  
304 Restaurant Food 2016 [cited 2016 24 January]. Available from:  
305 <http://www1.nyc.gov/site/doh/health/health-topics/salt-initiative-restaurantfood.page>.

306 13. New York City Department of Health and Mental Hygiene. National salt reduction initiative  
307 restaurant food categories and targets 2009 [cited 2014 February 23]. Available from:  
308 <http://www.nyc.gov/html/doh/downloads/pdf/cardio/cardio-salt-nsri-restaurant.pdf>.

309 14. U.S. Food and Drug Administration. Draft Guidance for Industry: Voluntary Sodium Reduction  
310 Goals: Target Mean and Upper Bound Concentrations for Sodium in Commercially Processed, Packaged,  
311 and Prepared Foods 2016 [cited 2017 February 1]. Available from:  
312 <http://www.fda.gov/Food/GuidanceRegulation/GuidanceDocumentsRegulatoryInformation/ucm494732>  
313 [.htm](http://www.fda.gov/Food/GuidanceRegulation/GuidanceDocumentsRegulatoryInformation/ucm494732).

15. Health Canada. Guidance for the Food Industry on Reducing Sodium in Processed Foods 2012 [cited 2015 December 30]. Available from: <http://www.hc-sc.gc.ca/fn-an/legislation/guide-ld/2012-sodium-reduction-indust-eng.php>.
16. Yum! Brands. Corporate Responsibility Report - Nutritional Improvement - Sodium 2013 [January 13 2014]. Available from: <http://www.yumcsr.com/food/nutritional-improvement.asp>.
17. Tim Hortons. Tim Horton's Nutrition Guide 2017 [cited 2017 October 17]. Available from: [https://www.timhortons.com/ca/en/pdf/TH\\_Nutrition\\_Guide\\_CE\\_2013\\_-\\_FINAL.pdf](https://www.timhortons.com/ca/en/pdf/TH_Nutrition_Guide_CE_2013_-_FINAL.pdf).
18. McDonald's. McDonald's USA: Commitments to Offer Improved Nutrition Choices 2011 [cited 2017 October 2017]. Available from: <http://news.mcdonalds.com/Corporate/manual-releases/2011/McDonald-s-USA--Commitments-to-Offer-Improved-Nutr>.
19. Institute of Medicine. Strategies to Reduce Sodium Intake in the United States. Washington, DC: The National Academies Press, 2010.
20. Health Canada. Sodium Reduction Strategy for Canada. Recommendations of the Canadian Sodium Working Group. 2010.
21. Dotsch M, Busch J, Batenburg M, Liem G, Tareilus E, Mueller R, et al. Strategies to reduce sodium consumption: a food industry perspective. Critical reviews in food science and nutrition. 2009 Nov;49(10):841-51. PubMed PMID: 19960392. Epub 2009/12/05. eng.
22. Sodium Reduction Market by Ingredients, Applications & Geography - Global Trends & Forecasts to 2018 2013 [cited 2014 March 31 2014]. Available from: [http://www.researchandmarkets.com/research/nkh4xt/sodium\\_reduction](http://www.researchandmarkets.com/research/nkh4xt/sodium_reduction).
23. Kurihara K. Glutamate: from discovery as a food flavor to role as a basic taste (umami). The American journal of clinical nutrition. 2009 Sep;90(3):719S-22S. PubMed PMID: 19640953. Epub 2009/07/31. eng.
24. International Glutamate Information Service. The Facts about Sodium Reduction and MSG 2017 [cited 2017 March 18]. Available from: <http://www.glutamate.org/English/nutrition/msg-in-reduced-sodium-diet.html>.
25. Kwok RH. Chinese-restaurant syndrome. N Engl J Med. 1968 Apr 04;278(14):796. PubMed PMID: 25276867. Epub 1968/04/04. eng.
26. Yang WH, Drouin MA, Herbert M, Mao Y, Karsh J. The monosodium glutamate symptom complex: assessment in a double-blind, placebo-controlled, randomized study. The Journal of allergy and clinical immunology. 1997 Jun;99(6 Pt 1):757-62. PubMed PMID: 9215242. Epub 1997/06/01. eng.
27. Geha RS, Beiser A, Ren C, Patterson R, Greenberger PA, Grammer LC, et al. Multicenter, double-blind, placebo-controlled, multiple-challenge evaluation of reported reactions to monosodium glutamate. Journal of Allergy and Clinical Immunology. 2000;106(5):973-80. PubMed PMID: 30949064. English.
28. Kenney RA, Tidball CS. Human susceptibility to oral monosodium L-glutamate. The American journal of clinical nutrition. 1972 Feb;25(2):140-6. PubMed PMID: 5009781. Epub 1972/02/01. eng.
29. Baad-Hansen L, Cairns B, Ernberg M, Svensson P. Effect of systemic monosodium glutamate (MSG) on headache and pericranial muscle sensitivity. Cephalalgia : an international journal of headache. 2010 Jan;30(1):68-76. PubMed PMID: 19438927. Epub 2009/05/15. eng.
30. Shimada A, Cairns BE, Vad N, Ulriksen K, Pedersen AM, Svensson P, et al. Headache and mechanical sensitization of human pericranial muscles after repeated intake of monosodium glutamate (MSG). The journal of headache and pain. 2013 Dec;14(1):2. PubMed PMID: 369875015. English.
31. Shimada A, Baad-Hansen L, Castrillon E, Ghafouri B, Stensson N, Gerdle B, et al. Differential effects of repetitive oral administration of monosodium glutamate on interstitial glutamate concentration and muscle pain sensitivity. Nutrition. 2015 01 Feb;31(2):315-23. PubMed PMID: 601345374. English.
32. Gore ME, Salmon PR. Chinese restaurant syndrome: fact or fiction? Lancet. 1980 Feb 02;1(8162):251-2. PubMed PMID: 6101693. Epub 1980/02/02. eng.

1  
2 363 33. Zanda G, Franciosi P, Tognoni G, Rizzo M, Standen SM, Morselli PL, et al. A double blind study on  
3 364 the effects of monosodium glutamate in man. *Biomedicine / [publiee pour l'AAICIG]*. 1973 May  
4 365 20;19(5):202-4. PubMed PMID: 4577013. Epub 1973/05/10. eng.  
5 366 34. Reif-Lehrer L. Possible significance of adverse reactions to glutamate in humans. *Federation*  
6 367 *proceedings*. 1976 Sep;35(11):2205-11. PubMed PMID: 782921. Epub 1976/09/01. eng.  
7 368 35. Prawirohardjono W, Dwiprahasto I, Astuti I, Hadiwandowo S, Kristin E, Muhammad M, et al. The  
8 369 administration to Indonesians of monosodium L-glutamate in Indonesian foods: An assessment of  
9 370 adverse reactions in a randomized double- blind, crossover, placebo-controlled study. *Journal of*  
10 371 *Nutrition*. 2000;130(4 SUPPL.):1074S-6S. PubMed PMID: 30173648. English.  
11 372 36. Bazzano G, D'Elia JA, Olson RE. Monosodium glutamate: feeding of large amounts in man and  
12 373 gerbils. *Science (New York, NY)*. 1970 Sep 18;169(3951):1208-9. PubMed PMID: 5450696. Epub  
13 374 1970/09/18. eng.  
14 375 37. Tarasoff L, Kelly MF. Monosodium L-glutamate: a double-blind study and review. *Food &*  
15 376 *Chemical Toxicology*. 1993 Dec;31(12):1019-35. PubMed PMID: 8282275. English.  
16 377 38. Rosenblum I, Bradley JD, Coulston F. Single and double blind studies with oral monosodium  
17 378 glutamate in man. *Toxicology and applied pharmacology*. 1971 Feb;18(2):367-73. PubMed PMID:  
18 379 4936399. Epub 1971/02/01. eng.  
19 380 39. Chevassus H, Renard E, Bertrand G, Mourand I, Puech R, Molinier N, et al. Effects of oral  
20 381 monosodium (L)-glutamate on insulin secretion and glucose tolerance in healthy volunteers. *British*  
21 382 *Journal of Clinical Pharmacology*. 2002;53(6):641-3. PubMed PMID: 34621790. English.  
22 383 40. Schaumburg HH, Byck R, Gerstl R, Mashman JH. Monosodium L-glutamate: its pharmacology  
23 384 and role in the Chinese restaurant syndrome. *Science (New York, NY)*. 1969 Feb 21;163(3869):826-8.  
24 385 PubMed PMID: 5764480. Epub 1969/02/21. eng.  
25 386 41. Colman AD. Possible psychiatric reactions to monosodium glutamate. *N Engl J Med*. 1978 Oct  
26 387 19;299(16):902. PubMed PMID: 692593. Epub 1978/10/19. eng.  
27 388 42. Stegink LD, Baker GL, Filer LJ, Jr. Modulating effect of Sustagen on plasma glutamate  
28 389 concentration in humans ingesting monosodium L-glutamate. *American Journal of Clinical Nutrition*.  
29 390 1983 Feb;37(2):194-200. PubMed PMID: 6823882. English.  
30 391 43. Stegink LD, Filer LJ, Jr., Baker GL, Bell EF. Effect of sucrose ingestion on plasma glutamate  
31 392 concentrations in humans administered monosodium L-glutamate. *American Journal of Clinical*  
32 393 *Nutrition*. 1986 Apr;43(4):510-5. PubMed PMID: 2870635. English.  
33 394 44. Scourboutakos M, L'Abbe M. Sodium levels in Canadian fast-food and sit-down restaurants.  
34 395 *Canadian journal of public health = Revue canadienne de sante publique*. 2013 Jan-Feb;104(1):e2-8.  
35 396 PubMed PMID: 23618115. Epub 2013/04/27. eng.  
36 397 45. Scourboutakos MJ, L'Abbe MR. Changes in sodium levels in chain restaurant foods in Canada  
37 398 (2010-2013): a longitudinal study. *CMAJ open*. 2014 Oct;2(4):E343-51. PubMed PMID: 25553327.  
38 399 Pubmed Central PMCID: PMC4270210. Epub 2015/01/02. eng.  
39 400 46. Scourboutakos MJ, L'Abbe MR. Restaurant menus: calories, caloric density, and serving size.  
40 401 *American journal of preventive medicine*. 2012 Sep;43(3):249-55. PubMed PMID: 22898117. Epub  
41 402 2012/08/18. eng.  
42 403 47. Monday Report on Retailers. Directory of restaurant and fast food chains in Canada. Toronto:  
43 404 Rogers Media Inc.; 2010.  
44 405 48. Beyreuther K, Biesalski HK, Fernstrom JD, Grimm P, Hammes WP, Heinemann U, et al. Consensus  
45 406 meeting: monosodium glutamate - an update. *European journal of clinical nutrition*. 2007  
46 407 Mar;61(3):304-13. PubMed PMID: 16957679. Epub 2006/09/08. eng.  
47 408 49. Headache Classification Committee of the International Headache Society (IHS). International  
48 409 Classification of Headache Disorders - 3rd edition - 8.1.5.1 Monosodium glutamate (MSG)-induced  
49 410 headache 2016. Available from: <https://www.ichd-3.org/8-headache-attributed-to-a-substance-or-its->  
50  
51  
52  
53  
54  
55  
56  
57  
58  
59  
60

- [withdrawal/8-1-headache-attributed-to-use-of-or-exposure-to-a-substance/8-1-5-headache-induced-by-food-and-or-additive/8-1-5-1-monosodium-glutamate-msg-induced-headache/](#).
50. Zhou Y, Danbolt NC. Glutamate as a neurotransmitter in the healthy brain. *Journal of neural transmission* (Vienna, Austria : 1996). 2014 Aug;121(8):799-817. PubMed PMID: 24578174. Pubmed Central PMCID: PMC4133642. Epub 2014/03/01. eng.
  51. O'Brien M, Cairns BE. Monosodium glutamate alters the response properties of rat trigeminovascular neurons through activation of peripheral NMDA receptors. *Neuroscience*. 2016 Oct 15;334:236-44. PubMed PMID: 27522962. Epub 2016/10/31. eng.
  52. Cairns BE, Dong X, Mann MK, Svensson P, Sessle BJ, Arendt-Nielsen L, et al. Systemic administration of monosodium glutamate elevates intramuscular glutamate levels and sensitizes rat masseter muscle afferent fibers. *Pain*. 2007 Nov;132(1-2):33-41. PubMed PMID: 17335976. Pubmed Central PMCID: PMC2096751. Epub 2007/03/06. eng.
  53. Gazerani P, Dong X, Wang M, Kumar U, Cairns BE. Sensitization of rat facial cutaneous mechanoreceptors by activation of peripheral N-methyl-D-aspartate receptors. *Brain research*. 2010 Mar 10;1319:70-82. PubMed PMID: 20080077. Epub 2010/01/19. eng.
  54. Laursen JC, Cairns BE, Dong XD, Kumar U, Somvanshi RK, Arendt-Nielsen L, et al. Glutamate dysregulation in the trigeminal ganglion: a novel mechanism for peripheral sensitization of the craniofacial region. *Neuroscience*. 2014 Jan 03;256:23-35. PubMed PMID: 24144624. Epub 2013/10/23. eng.
  55. Chan K, MaassenVanDenBrink A. Glutamate receptor antagonists in the management of migraine. *Drugs*. 2014 Jul;74(11):1165-76. PubMed PMID: 25030431. Epub 2014/07/18. eng.
  56. Martinez F, Castillo J, Rodriguez JR, Leira R, Noya M. Neuroexcitatory amino acid levels in plasma and cerebrospinal fluid during migraine attacks. *Cephalalgia : an international journal of headache*. 1993 Apr;13(2):89-93. PubMed PMID: 8098663. Epub 1993/04/01. eng.
  57. Cananzi AR, D'Andrea G, Perini F, Zamberlan F, Welch KM. Platelet and plasma levels of glutamate and glutamine in migraine with and without aura. *Cephalalgia : an international journal of headache*. 1995 Apr;15(2):132-5. PubMed PMID: 7641248. Epub 1995/04/01. eng.
  58. Giacometti T. Free and Bound Glutamate in Natural Products - from Glutamic Acid: *Advances in Biochemistry and Physiology* 1979 [cited 2017 April 11]. Available from: <http://www.ajinomoto.com.my/pdf/free-bound-glutamate-natural-products.pdf>.
  59. Stegink LD, Shepherd JA, Brummel MC, Murray LM. Toxicity of protein hydrolysate solutions: correlation of glutamate dose and neuronal necrosis to plasma amino acid levels in young mice. *Toxicology*. 1974 Sep;2(3):285-99. PubMed PMID: 4855229. Epub 1974/09/01. eng.
  60. Takasaki Y, Matsuzawa Y, Iwata S, O'hara Y, Yonetani S, Ichimura M. Toxicological Studies of Monosodium L-Glutamate in Rodents: Relationship Between Route of Administration and Neurotoxicity from: *Glutamic Acid: Advances in Biochemistry and Physiology* New York: Raven Press; 1979 [cited 2017 April 11]. Available from: <http://www.ajinomoto.com.my/pdf/toxicological-studies-monosodium-l-glutamate-rodents.pdf>.
  61. Geha RS, Beiser A, Ren C, Patterson R, Greenberger PA, Grammer LC, et al. Review of alleged reaction to monosodium glutamate and outcome of a multicenter double-blind placebo-controlled study. *Journal of Nutrition*. 2000;130(4 SUPPL.):1058S-62S. PubMed PMID: 30173645. English.



1  
2 455 **FIGURE TITLES**

3  
4 456 **Figure 1** – Percentage of fast-food items that contained each substitute and comparison of the  
5 457 proportion that decreased versus did not decrease in sodium per serving

6 458  
7  
8 459 **Figure 2** – Proportion of fast-food items that contained salt substitutes, by type

9 460  
10  
11 461 **Figure 3** – Magnitude of decrease in sodium (mg/serving) among fast-food items that contained  
12 462 a salt substitute versus foods that did not contain a salt substitute

13 463  
14  
15 464  
16  
17 465  
18  
19  
20  
21  
22  
23  
24  
25  
26  
27  
28  
29  
30  
31  
32  
33  
34  
35  
36  
37  
38  
39  
40  
41  
42  
43  
44  
45  
46  
47  
48  
49  
50  
51  
52  
53  
54  
55  
56  
57  
58  
59  
60

Confidential

**Figure 1** – Percentage of fast-food items that contained each substitute and comparison of the proportion of foods that decreased versus did not decrease in sodium per serving

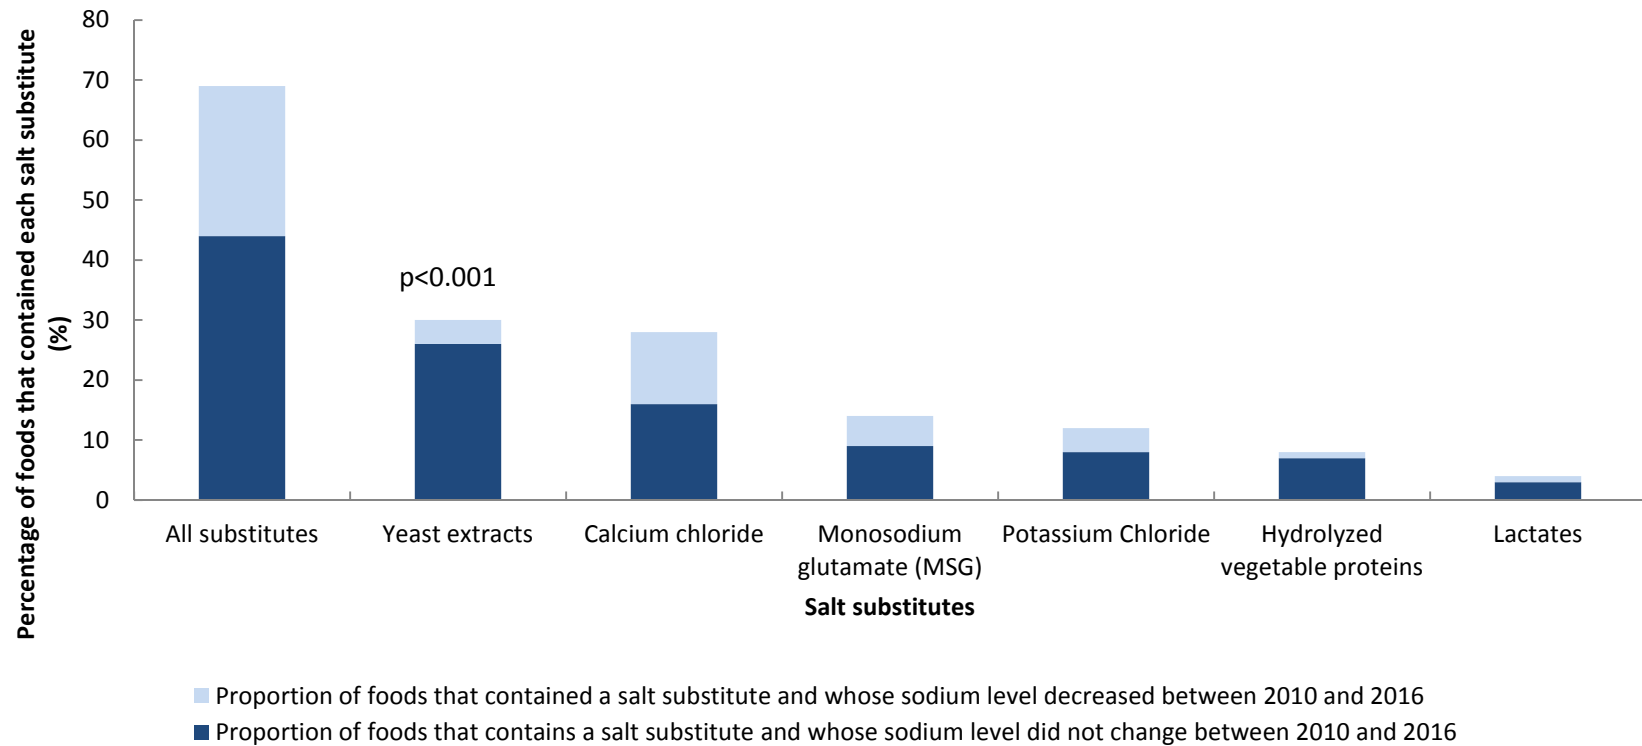

p-value represent chi-square tests comparing the association between containing a the respective salt substitute and likelihood of having decreased in sodium (mg per serving) between 2010 and 2016  
Salt substitutes were identified using the “Strategies to Reduce Sodium Intake in the United States” report (Appendix D) published by the Institute of Medicine (IOM)(19)



1  
2  
3  
4  
5  
6  
7  
8  
9  
10  
11  
12  
13  
14  
15  
16  
17  
18  
19  
20  
21  
22  
23  
24  
25  
26  
27  
28  
29  
30  
31  
32  
33  
34  
35  
36  
37  
38  
39  
40  
41  
42  
43  
44  
45  
46  
47

**Figure 2 – Proportion of fast-food items that contained salt substitutes, by type**

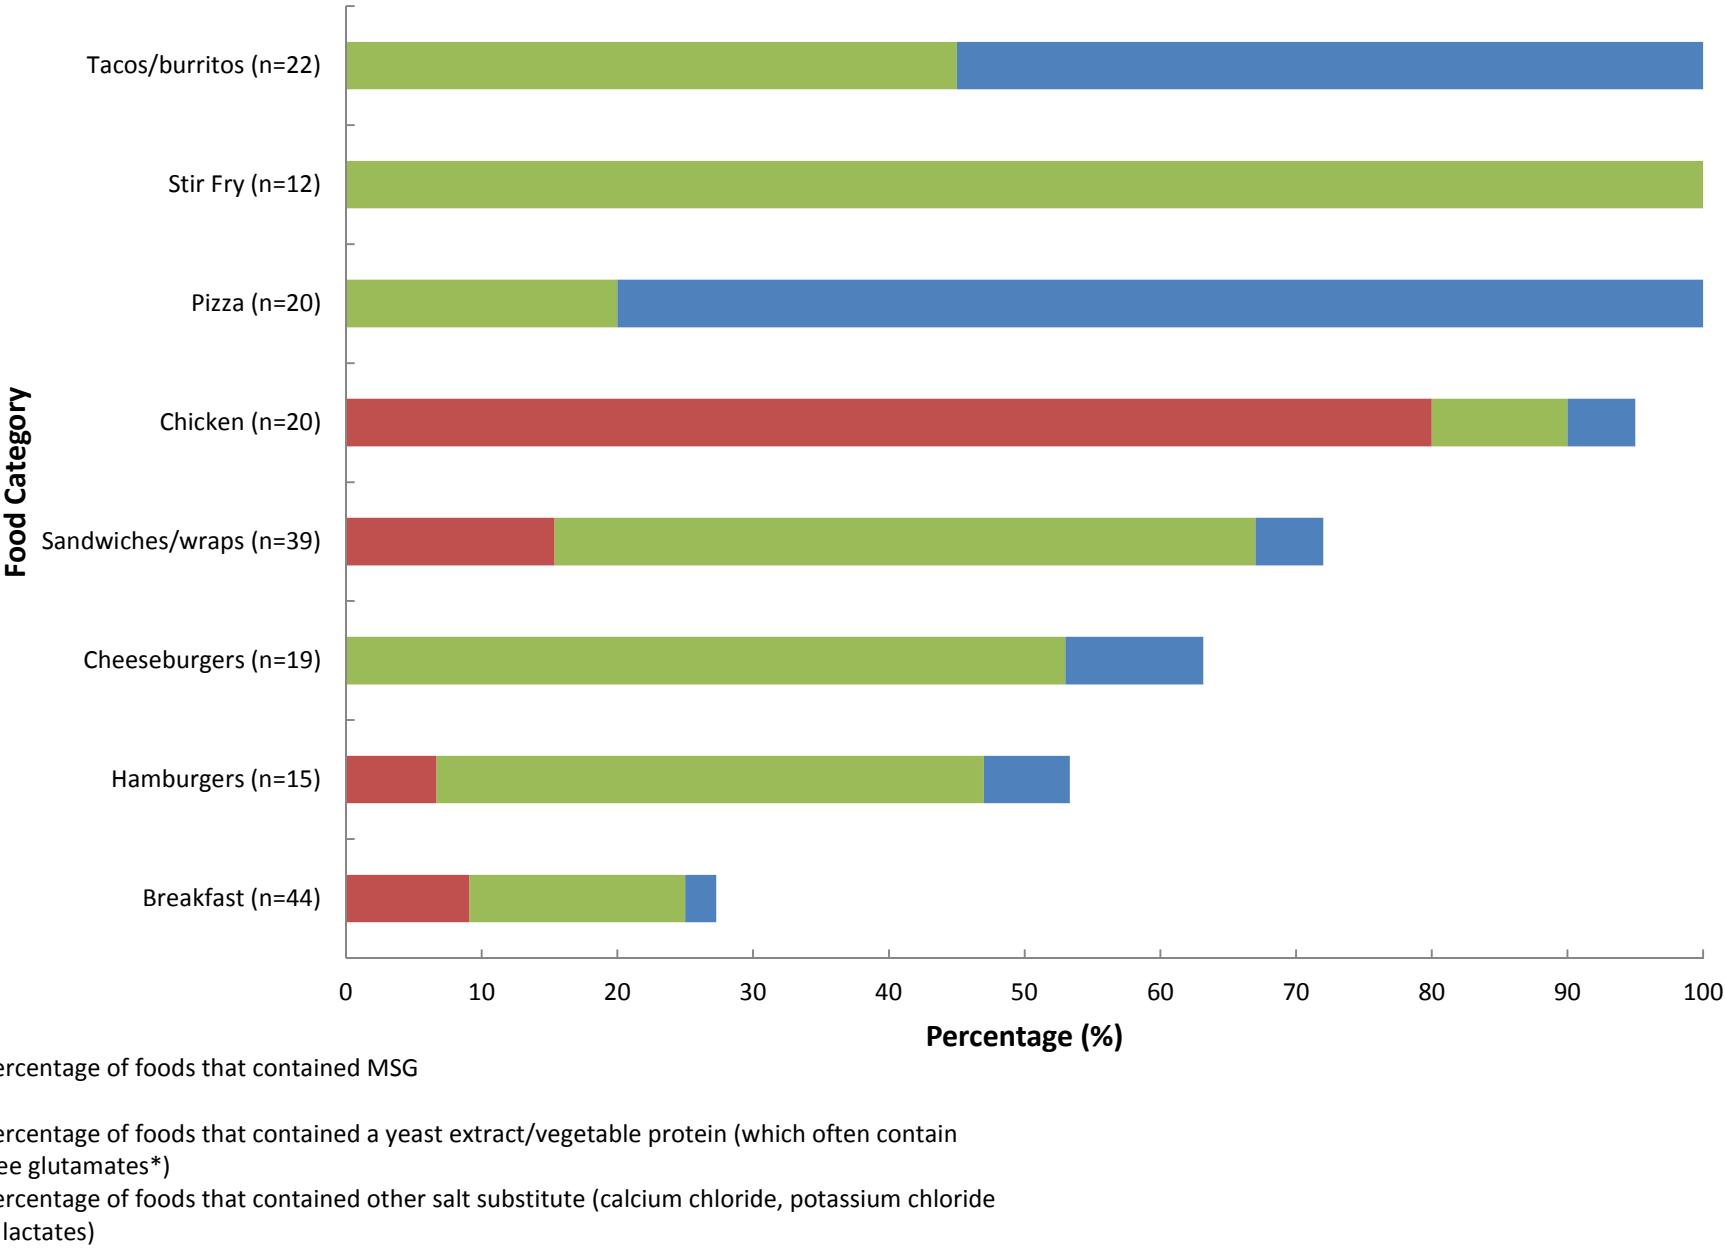

\*Yeast extracts and hydrolyzed vegetable proteins “often contain MSG” according to the “Strategies to Reduce Sodium Intake” report published by the Institute of Medicine(19)

**Figure 3** – Magnitude of decrease in sodium (mg/serving) among fast-food items that contained a salt substitute versus foods that did not contain a salt substitute

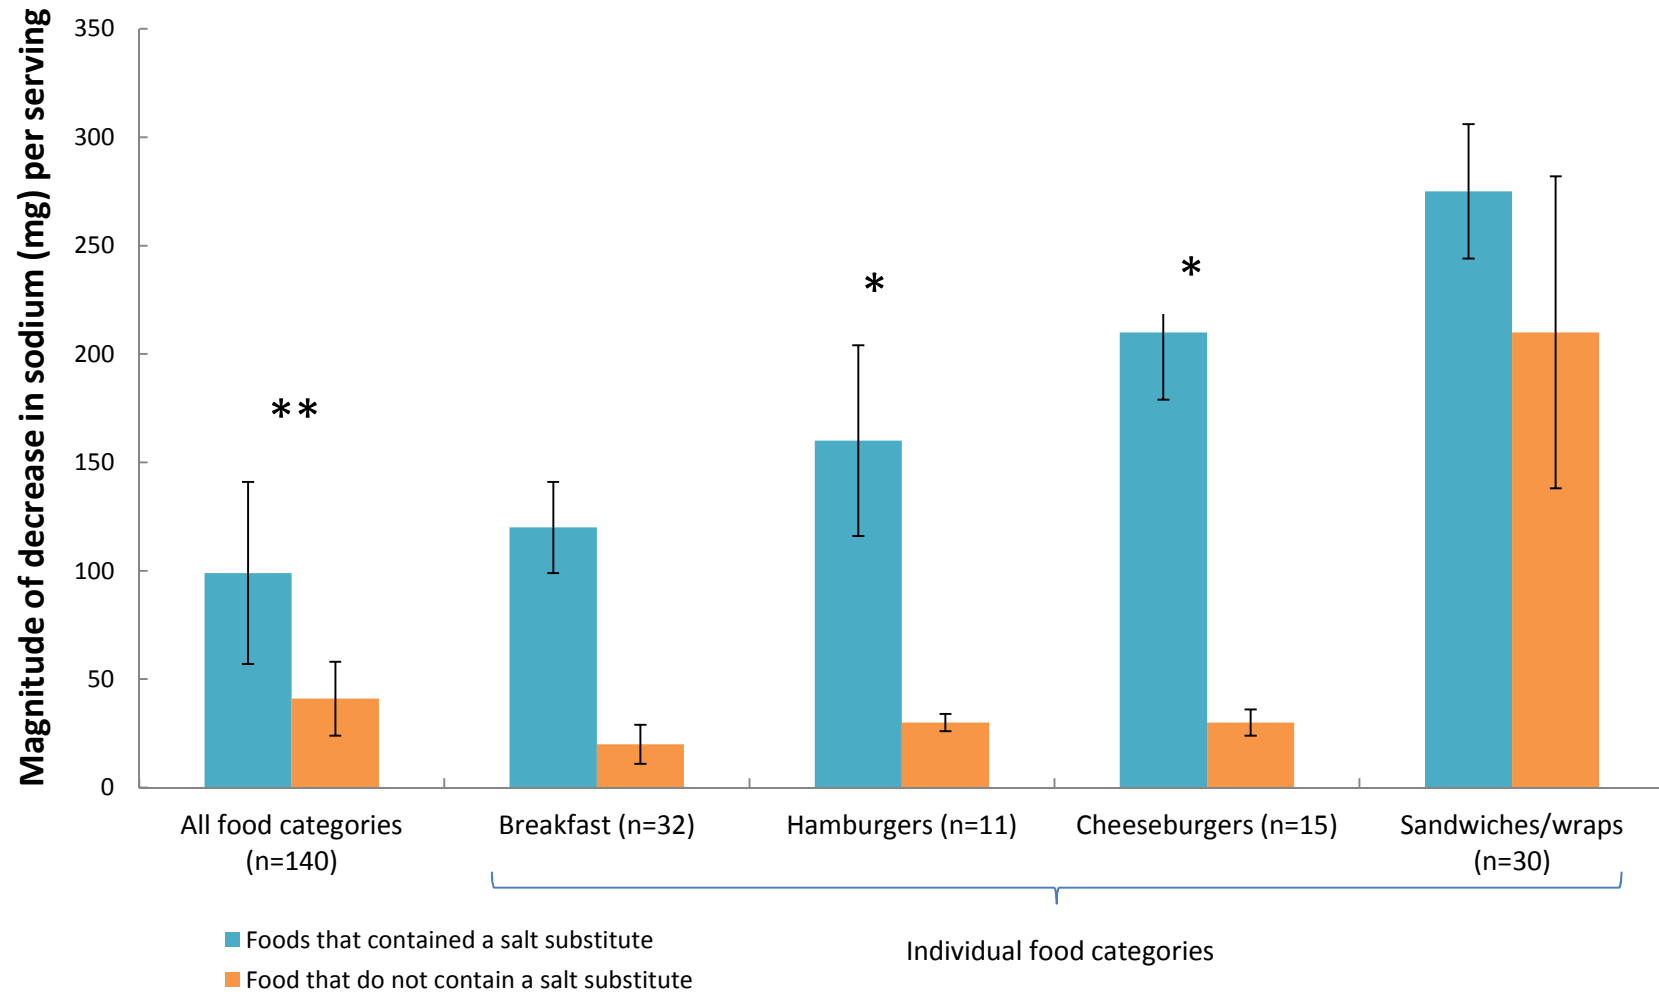

Bars represent median  $\pm$  standard errors

\* $p=0.01$ , \*\* $p<0.001$ , non-parametric Wilcoxon-Mann-Whitney tests

1  
2  
3  
4  
5  
6  
7  
8  
9  
10  
11  
12  
13  
14  
15  
16  
17  
18  
19  
20  
21  
22  
23  
24  
25  
26  
27  
28  
29  
30  
31  
32  
33  
34  
35  
36  
37  
38  
39  
40  
41  
42  
43  
44  
45  
46  
47

“All food categories” includes (breakfast, cheeseburgers, chicken, hot dogs, hamburgers, kids’ meals, fries, pizza, poutine, salad entrées with meat, sandwiches/wraps, mashed potatoes, rice, soup, tacos/burritos)  
Only categories with >10 foods were presented individually in this graph

Confidential

**Supplementary Table 1** List of salt substitutes

| Salt substitutes <sup>a</sup>                    | Details/specific names that were searched for                                                                                                                                                                                               | Found in the restaurant food supply |
|--------------------------------------------------|---------------------------------------------------------------------------------------------------------------------------------------------------------------------------------------------------------------------------------------------|-------------------------------------|
| Potassium chloride (KCl)                         |                                                                                                                                                                                                                                             | yes                                 |
| Calcium chloride (CaCl <sub>2</sub> )            |                                                                                                                                                                                                                                             | yes                                 |
| Magnesium chloride (MgCl <sub>2</sub> )          |                                                                                                                                                                                                                                             | no                                  |
| Magnesium sulfate (MgSO <sub>4</sub> )           |                                                                                                                                                                                                                                             | no                                  |
| Salts with altered crystal structure             | The prevalence of this substitute could not be assessed in this study                                                                                                                                                                       | Unknown                             |
| Monosodium glutamate (MSG) and other glutamates  | Monosodium glutamate (E 621), glutamic acid (E 620), glutamate (E 620), monopotassium glutamate (E 622), calcium glutamate (E 623), monoammonium glutamate (E 624), magnesium glutamate (E 625), natrium glutamate, Umami, Ajnimoto, Vetsin | yes                                 |
| Yeast extracts and hydrolyzed vegetable proteins | Hydrolyzed yeast protein, hydrolyzed vegetable protein, hydrolyzed yeast extract, yeast extract, torula yeast, autolyzed yeast, autolyzed plant protein, soy sauce, soy sauce extract, any "hydrolyzed protein"                             | yes                                 |
| Nucleotides                                      | Inosine-5'-monophosphate (IMP), guanosin-5'-monophosphate                                                                                                                                                                                   | no                                  |
| Amino acids                                      | Especially arginine                                                                                                                                                                                                                         | no                                  |
| Lactates                                         | Potassium lactate, calcium lactate, sodium lactate                                                                                                                                                                                          | yes                                 |
| Compounds that reduce bitterness                 | Adenosine-5'-monophosphate, DHB (2,4-dihydroxybenzoic acid), sodium gluconate                                                                                                                                                               | no                                  |

<sup>a</sup>This list of salt substitutes was derived from Appendix D of the Institute of Medicine's report on "Strategies to reduce sodium intakes in the United States"(19)

1  
2  
3  
4  
5  
6  
7  
8  
9  
10  
11  
12  
13  
14  
15  
16  
17  
18  
19  
20  
21  
22  
23  
24  
25  
26  
27  
28  
29  
30  
31  
32  
33  
34  
35  
36  
37  
38  
39  
40  
41  
42  
43  
44  
45  
46  
47

**Table 1. STROBE-nut: An extension of the STROBE statement for nutritional epidemiology**

Lachat C et al. (2016) STrengthening the Reporting of OBservational studies in Epidemiology – Nutritional Epidemiology (STROBE-nut): an extension of the STROBE statement. Plos Medicine 13(6) <http://dx.doi.org/10.1371/journal.pmed.1002036> [pdf](#) or [online](#) version.

| Item                      | Item nr | STROBE recommendations                                                                                                                                                                              | Extension for Nutritional Epidemiology studies (STROBE-nut)                                                                                        | Reported on page # |
|---------------------------|---------|-----------------------------------------------------------------------------------------------------------------------------------------------------------------------------------------------------|----------------------------------------------------------------------------------------------------------------------------------------------------|--------------------|
| <b>Title and abstract</b> | 1       | (a) Indicate the study’s design with a commonly used term in the title or the abstract.<br><br>(b) Provide in the abstract an informative and balanced summary of what was done and what was found. | <b>nut-1</b> State the dietary/nutritional assessment method(s) used in the title, abstract, or keywords.                                          | 2                  |
| <b>Introduction</b>       |         |                                                                                                                                                                                                     |                                                                                                                                                    |                    |
| Background rationale      | 2       | Explain the scientific background and rationale for the investigation being reported.                                                                                                               |                                                                                                                                                    | <u>2/3</u>         |
| Objectives                | 3       | State specific objectives, including any pre-specified hypotheses.                                                                                                                                  |                                                                                                                                                    | 3                  |
| <b>Methods</b>            |         |                                                                                                                                                                                                     |                                                                                                                                                    |                    |
| Study design              | 4       | Present key elements of study design early in the paper.                                                                                                                                            |                                                                                                                                                    | 3/4                |
| Settings                  | 5       | Describe the setting, locations, and relevant dates, including periods of recruitment, exposure, follow-up, and data collection.                                                                    | <b>nut-5</b> Describe any characteristics of the study settings that might affect the dietary intake or nutritional status of the participants, if | 3/4                |

| Item         | Item nr | STROBE recommendations                                                                                                                                                                                                                                                                                                                                                                                                                                                                                                                                                                                                                                                              | Extension for Nutritional Epidemiology studies (STROBE-nut)                                                                                                                                                                       | Reported on page # |
|--------------|---------|-------------------------------------------------------------------------------------------------------------------------------------------------------------------------------------------------------------------------------------------------------------------------------------------------------------------------------------------------------------------------------------------------------------------------------------------------------------------------------------------------------------------------------------------------------------------------------------------------------------------------------------------------------------------------------------|-----------------------------------------------------------------------------------------------------------------------------------------------------------------------------------------------------------------------------------|--------------------|
|              |         |                                                                                                                                                                                                                                                                                                                                                                                                                                                                                                                                                                                                                                                                                     | applicable.                                                                                                                                                                                                                       |                    |
| Participants | 6       | <p>a) Cohort study—Give the eligibility criteria, and the sources and methods of selection of participants. Describe methods of follow-up.</p> <p>Case-control study—Give the eligibility criteria, and the sources and methods of case ascertainment and control selection. Give the rationale for the choice of cases and controls.</p> <p>Cross-sectional study—Give the eligibility criteria, and the sources and methods of selection of participants.</p> <p>(b) Cohort study—For matched studies, give matching criteria and number of exposed and unexposed.</p> <p>Case-control study—For matched studies, give matching criteria and the number of controls per case.</p> | <b>nut-6</b> Report particular dietary, physiological or nutritional characteristics that were considered when selecting the target population.                                                                                   | N/A                |
| Variables    | 7       | Clearly define all outcomes, exposures, predictors, potential confounders, and effect modifiers. Give diagnostic criteria, if applicable.                                                                                                                                                                                                                                                                                                                                                                                                                                                                                                                                           | <p><b>nut-7.1</b> Clearly define foods, food groups, nutrients, or other food components.</p> <p><b>nut-7.2</b> When using dietary patterns or indices, describe the methods to obtain them and their nutritional properties.</p> | 3/4                |

1  
2  
3  
4  
5  
6  
7  
8  
9  
10  
11  
12  
13  
14  
15  
16  
17  
18  
19  
20  
21  
22  
23  
24  
25  
26  
27  
28  
29  
30  
31  
32  
33  
34  
35  
36  
37  
38  
39  
40  
41  
42  
43  
44  
45  
46  
47

| Item                        | Item nr | STROBE recommendations                                                                                                                                                               | Extension for Nutritional Epidemiology studies (STROBE-nut)                                                                                                                                                                                                                                                                                                                                                                                                                                                                                                                                                                                                                                                                                                                                                                                                                                                                                                                                                                                                                        | Reported on page # |
|-----------------------------|---------|--------------------------------------------------------------------------------------------------------------------------------------------------------------------------------------|------------------------------------------------------------------------------------------------------------------------------------------------------------------------------------------------------------------------------------------------------------------------------------------------------------------------------------------------------------------------------------------------------------------------------------------------------------------------------------------------------------------------------------------------------------------------------------------------------------------------------------------------------------------------------------------------------------------------------------------------------------------------------------------------------------------------------------------------------------------------------------------------------------------------------------------------------------------------------------------------------------------------------------------------------------------------------------|--------------------|
| Data sources - measurements | 8       | For each variable of interest, give sources of data and details of methods of assessment (measurement).Describe comparability of assessment methods if there is more than one group. | <p><b>nut-8.1</b> Describe the dietary assessment method(s), e.g., portion size estimation, number of days and items recorded, how it was developed and administered, and how quality was assured. Report if and how supplement intake was assessed.</p> <p><b>nut-8.2</b> Describe and justify food composition data used. Explain the procedure to match food composition with consumption data. Describe the use of conversion factors, if applicable.</p> <p><b>nut-8.3</b> Describe the nutrient requirements, recommendations, or dietary guidelines and the evaluation approach used to compare intake with the dietary reference values, if applicable.</p> <p><b>nut-8.4</b> When using nutritional biomarkers, additionally use the STROBE Extension for Molecular Epidemiology (STROBE-ME). Report the type of biomarkers used and their usefulness as dietary exposure markers.</p> <p><b>nut-8.5</b> Describe the assessment of nondietary data (e.g., nutritional status and influencing factors) and timing of the assessment of these variables in relation to</p> | 3/4                |



| Item                   | Item nr | STROBE recommendations                                                                                                                                                                                                                                                                                           | Extension for Nutritional Epidemiology studies (STROBE-nut)                                                                                                                                                                                                                                                                                                   | Reported on page # |
|------------------------|---------|------------------------------------------------------------------------------------------------------------------------------------------------------------------------------------------------------------------------------------------------------------------------------------------------------------------|---------------------------------------------------------------------------------------------------------------------------------------------------------------------------------------------------------------------------------------------------------------------------------------------------------------------------------------------------------------|--------------------|
|                        |         |                                                                                                                                                                                                                                                                                                                  | <p>dietary assessment.</p> <p><b>nut-8.6</b> Report on the validity of the dietary or nutritional assessment methods and any internal or external validation used in the study, if applicable.</p>                                                                                                                                                            |                    |
| Bias                   | 9       | Describe any efforts to address potential sources of bias.                                                                                                                                                                                                                                                       | <b>nut-9</b> Report how bias in dietary or nutritional assessment was addressed, e.g., misreporting, changes in habits as a result of being measured, or data imputation from other sources                                                                                                                                                                   | 7                  |
| Study Size             | 10      | Explain how the study size was arrived at.                                                                                                                                                                                                                                                                       |                                                                                                                                                                                                                                                                                                                                                               | 4                  |
| Quantitative variables | 11      | Explain how quantitative variables were handled in the analyses. If applicable, describe which groupings were chosen and why.                                                                                                                                                                                    | <b>nut-11</b> Explain categorization of dietary/nutritional data (e.g., use of N-tiles and handling of nonconsumers) and the choice of reference category, if applicable.                                                                                                                                                                                     | 4/5                |
| Statistical Methods    | 12      | <p>(a) Describe all statistical methods, including those used to control for confounding</p> <p>(b) Describe any methods used to examine subgroups and interactions.</p> <p>(c) Explain how missing data were addressed.</p> <p>(d) Cohort study—If applicable, explain how loss to follow-up was addressed.</p> | <p><b>nut-12.1</b> Describe any statistical method used to combine dietary or nutritional data, if applicable.</p> <p><b>nut-12.2</b> Describe and justify the method for energy adjustments, intake modeling, and use of weighting factors, if applicable.</p> <p><b>nut-12.3</b> Report any adjustments for measurement error, i.e., from a validity or</p> | 5                  |

1  
2  
3  
4  
5  
6  
7  
8  
9  
10  
11  
12  
13  
14  
15  
16  
17  
18  
19  
20  
21  
22  
23  
24  
25  
26  
27  
28  
29  
30  
31  
32  
33  
34  
35  
36  
37  
38  
39  
40  
41  
42  
43  
44  
45  
46  
47

| Item             | Item nr | STROBE recommendations                                                                                                                                                                                                                                                                                                | Extension for Nutritional Epidemiology studies (STROBE-nut)                                                                                                                                                    | Reported on page # |
|------------------|---------|-----------------------------------------------------------------------------------------------------------------------------------------------------------------------------------------------------------------------------------------------------------------------------------------------------------------------|----------------------------------------------------------------------------------------------------------------------------------------------------------------------------------------------------------------|--------------------|
|                  |         | Case-control study—If applicable, explain how matching of cases and controls was addressed.                                                                                                                                                                                                                           | calibration study.                                                                                                                                                                                             |                    |
|                  |         | Cross-sectional study—If applicable, describe analytical methods taking account of sampling strategy.                                                                                                                                                                                                                 |                                                                                                                                                                                                                |                    |
|                  |         | (e) Describe any sensitivity analyses.                                                                                                                                                                                                                                                                                |                                                                                                                                                                                                                |                    |
| <b>Results</b>   |         |                                                                                                                                                                                                                                                                                                                       |                                                                                                                                                                                                                |                    |
| Participants     | 13      | (a) Report the numbers of individuals at each stage of the study—e.g., numbers potentially eligible, examined for eligibility, confirmed eligible, included in the study, completing follow-up, and analyzed.<br><br>(b) Give reasons for non-participation at each stage.<br><br>(c) Consider use of a flow diagram. | <b>nut-13</b> Report the number of individuals excluded based on missing, incomplete or implausible dietary/nutritional data.                                                                                  | 3/4                |
| Descriptive data | 14      | (a) Give characteristics of study participants (e.g., demographic, clinical, social) and information on exposures and potential confounders<br><br>(b) Indicate the number of participants with missing data for each variable of interest<br><br>(c) Cohort study—Summarize follow-up time                           | <b>nut-14</b> Give the distribution of participant characteristics across the exposure variables if applicable. Specify if food consumption of total population or consumers only were used to obtain results. | 3/4                |

| Item           | Item nr | STROBE recommendations                                                                                                                                                                                                                                                                                                                                                                                                            | Extension for Nutritional Epidemiology studies (STROBE-nut)                                                                     | Reported on page # |
|----------------|---------|-----------------------------------------------------------------------------------------------------------------------------------------------------------------------------------------------------------------------------------------------------------------------------------------------------------------------------------------------------------------------------------------------------------------------------------|---------------------------------------------------------------------------------------------------------------------------------|--------------------|
|                |         | (e.g., average and total amount)                                                                                                                                                                                                                                                                                                                                                                                                  |                                                                                                                                 |                    |
| Outcome data   | 15      | Cohort study—Report numbers of outcome events or summary measures over time.<br><br>Case-control study—Report numbers in each exposure category, or summary measures of exposure.<br><br>Cross-sectional study—Report numbers of outcome events or summary measures.                                                                                                                                                              |                                                                                                                                 | N/A                |
| Main results   | 16      | (a) Give unadjusted estimates and, if applicable, confounder-adjusted estimates and their precision (e.g., 95% confidence interval).<br><br>Make clear which confounders were adjusted for and why they were included.<br><br>(b) Report category boundaries when continuous variables were categorized.<br><br>(c) If relevant, consider translating estimates of relative risk into absolute risk for a meaningful time period. | <b>nut-16</b> Specify if nutrient intakes are reported with or without inclusion of dietary supplement intake, if applicable.   | 5                  |
| Other analyses | 17      | Report other analyses done—e.g., analyses of subgroups and interactions and sensitivity analyses.                                                                                                                                                                                                                                                                                                                                 | <b>nut-17</b> Report any sensitivity analysis (e.g., exclusion of misreporters or outliers) and data imputation, if applicable. | 6                  |

1  
2  
3  
4  
5  
6  
7  
8  
9  
10  
11  
12  
13  
14  
15  
16  
17  
18  
19  
20  
21  
22  
23  
24  
25  
26  
27  
28  
29  
30  
31  
32  
33  
34  
35  
36  
37  
38  
39  
40  
41  
42  
43  
44  
45  
46  
47

| Item                          | Item nr | STROBE recommendations                                                                                                                                                      | Extension for Nutritional Epidemiology studies (STROBE-nut)                                                                                          | Reported on page # |
|-------------------------------|---------|-----------------------------------------------------------------------------------------------------------------------------------------------------------------------------|------------------------------------------------------------------------------------------------------------------------------------------------------|--------------------|
| <b>Discussion</b>             |         |                                                                                                                                                                             |                                                                                                                                                      |                    |
| Key results                   | 18      | Summarize key results with reference to study objectives.                                                                                                                   |                                                                                                                                                      | 6                  |
| Limitation                    | 19      | Discuss limitations of the study, taking into account sources of potential bias or imprecision. Discuss both direction and magnitude of any potential bias.                 | <b>nut-19</b> Describe the main limitations of the data sources and assessment methods used and implications for the interpretation of the findings. | 7                  |
| Interpretation                | 20      | Give a cautious overall interpretation of results considering objectives, limitations, multiplicity of analyses, results from similar studies, and other relevant evidence. | <b>nut-20</b> Report the nutritional relevance of the findings, given the complexity of diet or nutrition as an exposure.                            | 6/7                |
| Generalizability              | 21      | Discuss the generalizability (external validity) of the study results.                                                                                                      |                                                                                                                                                      |                    |
| <b>Other information</b>      |         |                                                                                                                                                                             |                                                                                                                                                      |                    |
| Funding                       | 22      | Give the source of funding and the role of the funders for the present study and, if applicable, for the original study on which the present article is based.              |                                                                                                                                                      | 1                  |
| <i>Ethics</i>                 |         |                                                                                                                                                                             | <b>nut-22.1</b> Describe the procedure for consent and study approval from ethics committee(s).                                                      | N/A                |
| <i>Supplementary material</i> |         |                                                                                                                                                                             | <b>nut-22.2</b> Provide data collection tools and data as online material or explain how they can                                                    | 16                 |

| Item | Item nr | STROBE recommendations | Extension for Nutritional Epidemiology studies (STROBE-nut) | Reported on page # |
|------|---------|------------------------|-------------------------------------------------------------|--------------------|
|      |         |                        | be accessed.                                                |                    |

Confidential
